# Supplementary material for: Carbon dynamics in the Mekong Delta
Source: Copernicus journal article supplement (doi:10.5194/bg-2017-444), 2017-10-24
Supplement: Supplementary file 1 [file bg-2017-444-supplement.pdf]

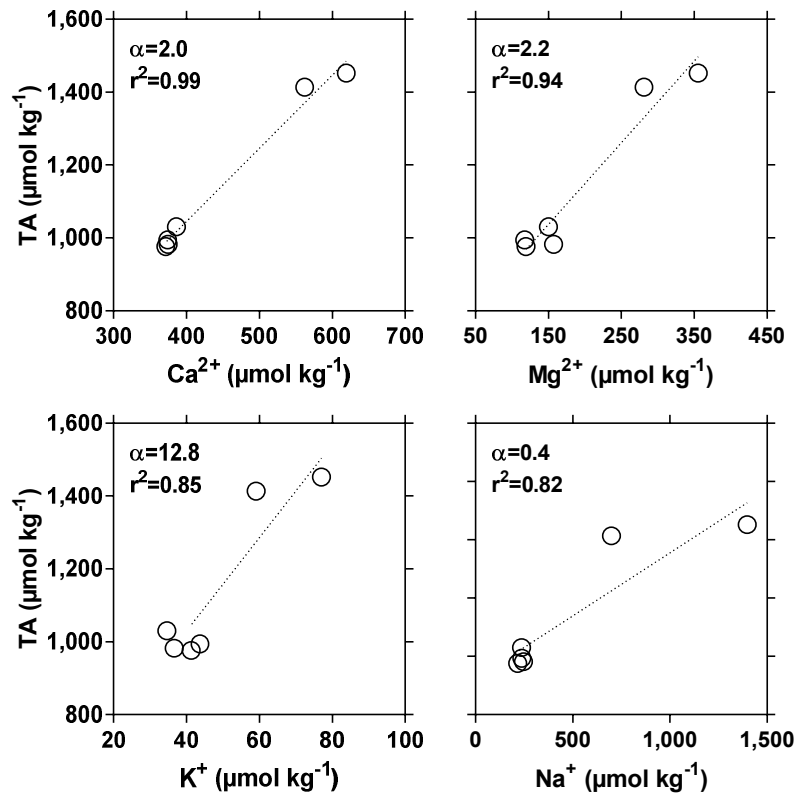

Figure S1 – Variations of total alkalinity (TA in  $\mu\text{mol kg}^{-1}$ ) as a function of  $\text{Ca}^{2+}$ ,  $\text{Mg}^{2+}$ ,  $\text{K}^+$  and  $\text{Na}^+$  (all in  $\mu\text{mol kg}^{-1}$ ) in the freshwaters (salinity 0) of the three branches of the Mekong delta (My Tho, Ham Luong and Co Chien), in December 2003, April 2004 and October 2004.  $\alpha$  indicates the slope of the linear regression line (dotted line).

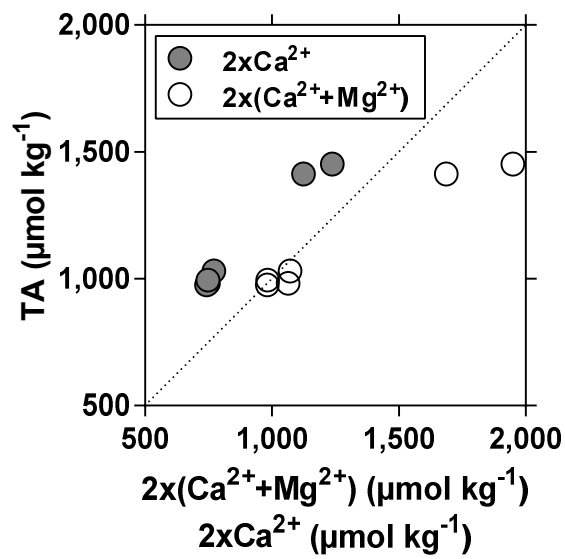

Fig. S2 - Variations of total alkalinity (TA in  $\mu\text{mol kg}^{-1}$ ) as a function of  $2 \times \text{Ca}^{2+}$  and  $2 \times (\text{Ca}^{2+} + \text{Mg}^{2+})$  (both in  $\mu\text{mol kg}^{-1}$ ) in the freshwaters (salinity 0) of the three branches of the Mekong delta (My Tho, Ham Luong and Co Chien), in December 2003, April 2004 and October 2004. Dotted line indicates the 1:1 line. If TA was due exclusively to weathering of calcite  $\text{CaCO}_3$  the data points would fall on the 1:1 line. Deviation from the 1:1 line indicate a contribution of weathering of dolomite ( $\text{MgCa}(\text{CO}_3)_2$ ) to TA.

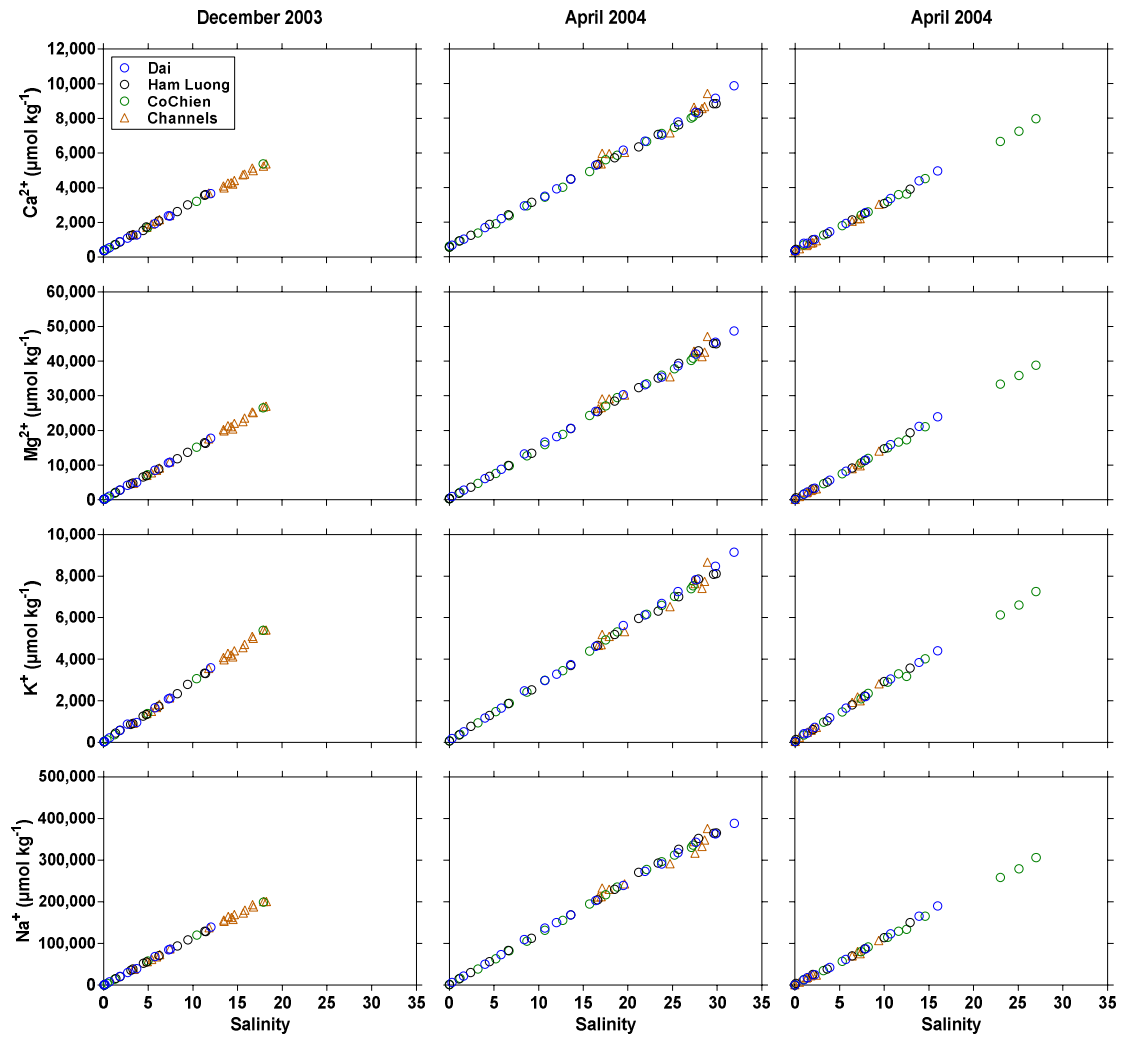

Fig. S3 - Distribution as a function of salinity of Ca<sup>2+</sup>, Mg<sup>2+</sup>, K<sup>+</sup> and Na<sup>+</sup> in the three branches of the Mekong delta (My Tho, Ham Luong and Co Chien) and side channels, in December 2003, April 2004 and October 2004.
